# Supplementary material
Source: PubMed Central journal article supplement (PMC9531099)

## Supplemental Online Content

Watanabe A, Yasuhara J, Iwagami M, et al. Peripartum outcomes associated with COVID-19 vaccination during pregnancy: a systematic review and meta-analysis. *JAMA Pediatr*. Published online October 3, 2022. doi:10.1001/jamapediatrics.2022.3456

**eTable 1.** GRADE evidence profile for the included studies

**eTable 2.** Outcomes of all studies

**eTable 3.** The results of Egger's linear regression tests of the primary outcomes

**eTable 4.** Definitions of postpartum hemorrhage in each study

**eFigure 1.** Risk of bias summary

**eFigure 2.** Funnel plots of the primary outcomes

**eFigure 3.** Forest plot showing the odds ratio of low Apgar score (<7 at 5 min of birth)

**eFigure 4.** Forest plots showing the odds ratio of preterm birth

**eFigure 5.** Forest plots showing the odds ratio of small size for gestational age

**eFigure 6.** Forest plots showing the odds ratio of small size for gestational age (a: women who received COVID-19 vaccination during the first trimester vs. women who did not receive COVID-19 vaccination during pregnancy, b: women who received COVID-19 vaccination during the second or third trimester vs. women who did not receive COVID-19 vaccination during pregnancy)

This supplemental material has been provided by the authors to give readers additional information about their work.

**eTable 1. GRADE evidence profile for the included studies**

| First author                  | Study design        | Risk of bias                                                        | Inconsistency                                      | Indirectness                                          | Imprecision             | Publication bias | Effect size | Dose-response | All plausible confounding and bias                                       | Quality grading |
|-------------------------------|---------------------|---------------------------------------------------------------------|----------------------------------------------------|-------------------------------------------------------|-------------------------|------------------|-------------|---------------|--------------------------------------------------------------------------|-----------------|
| Mayo RP <sup>24</sup>         | Observational study | Study subject was not a close representative of general population. | No serious inconsistency.                          | Research question was to investigate immune-response. | No serious imprecision. | NA               | Not large   | NA            | Older age in the vaccinated group.                                       | Very low        |
| Theiler RN <sup>25</sup>      | Observational study | Study subject was not a close representative of general population. | No serious inconsistency.                          | No serious indirectness.                              | No serious imprecision. | NA               | Not large   | NA            | Older age and higher infertility treatment rate in the vaccinated group. | Low             |
| Rottenstreich M <sup>26</sup> | Observational study | Low risk of bias                                                    | Inconsistency between NICU admission and the other | No serious indirectness.                              | No serious imprecision. | NA               | Not large   | NA            | Older age and higher rate of previous miscarriage,                       | Low             |

|                            |                     |                                                                     |                           |                          |                         |    |           |    |                                                   |          |
|----------------------------|---------------------|---------------------------------------------------------------------|---------------------------|--------------------------|-------------------------|----|-----------|----|---------------------------------------------------|----------|
|                            |                     |                                                                     | neonatal outcomes.        |                          |                         |    |           |    | cesarean delivery, and infertility treatment.     |          |
| Lipkind HS <sup>17</sup>   | Observational study | Low risk of bias                                                    | No serious inconsistency. | No serious indirectness. | No serious imprecision. | NA | Not large | NA | Older age.                                        | Moderate |
| Blakeway H <sup>27</sup>   | Observational study | Study subject was not a close representative of general population. | No serious inconsistency. | No serious indirectness. | No serious imprecision. | NA | Not large | NA | Older age and higher proportion of comorbidities. | Low      |
| Goldshtein I <sup>15</sup> | Observational study | Low risk of bias                                                    | No serious inconsistency. | No serious indirectness. | No serious imprecision. | NA | Not large | NA | Older age and higher proportion of comorbidities. | Moderate |
| Dick A <sup>28</sup>       | Observational study | Study subject was not a close representative of general population. | No serious inconsistency. | No serious indirectness. | No serious imprecision. | NA | Not large | NA | No obvious confounding factors.                   | Low      |

|                         |                     |                  |                           |                          |                         |    |           |    |                                                   |          |
|-------------------------|---------------------|------------------|---------------------------|--------------------------|-------------------------|----|-----------|----|---------------------------------------------------|----------|
| Fell DB <sup>18</sup>   | Observational study | Low risk of bias | No serious inconsistency. | No serious indirectness. | No serious imprecision. | NA | Not large | NA | No obvious confounding factors.                   | Moderate |
| Magnus MC <sup>19</sup> | Observational study | Low risk of bias | No serious inconsistency. | No serious indirectness. | No serious imprecision. | NA | Not large | NA | Older age and higher proportion of comorbidities. | Moderate |

NA, not applicable

**eTable 2. Outcomes of all studies**

| First author                  | Preterm birth        | SGA                  | Low Apgar score (<7 at 5min) | NICU admission       | IFD                   | SARS-CoV-2 infection | Cesarean delivery    | Postpartum hemorrhage | Chorioamnionitis      |
|-------------------------------|----------------------|----------------------|------------------------------|----------------------|-----------------------|----------------------|----------------------|-----------------------|-----------------------|
| Mayo RP <sup>24</sup>         | OR 0.92 (0.44-1.92)  | NA                   | NA                           | OR 0.68 (0.23-2.01)  | NA                    | NA                   | NA                   | NA                    | NA                    |
| Theiler RN <sup>25</sup>      | OR 1.10 (0.61-1.98)  | NA                   | OR 1.05 (0.32-3.45)          | OR 1.21 (0.16-9.15)  | OR 1.02 (0.06-17.34)  | OR 0.11 (0.03-0.40)  | OR 1.08 (0.75-1.56)  | OR 2.67 (0.31-23.00)  | NA                    |
| Rottenstreich M <sup>26</sup> | OR 1.01 (0.61-1.67)  | OR 1.26 (0.93-1.71)  | OR 1.17 (0.65-2.11)          | OR 0.90 (0.56-1.45)  | OR 1.50 (0.43-5.23)   | NA                   | OR 1.52 (1.15-2.01)  | OR 0.71 (0.50-1.01)   | OR 0.80 (0.41-1.56)   |
| Lipkind HS <sup>17</sup>      | OR 0.68 (0.61-0.76)  | OR 1.00 (0.92-1.09)  | NA                           | NA                   | NA                    | OR 0.79 (0.69-0.90)  | NA                   | NA                    | NA                    |
| Blakeway H <sup>27</sup>      | NA                   | aOR 1.00 (0.55-1.82) | NA                           | aOR 1.05 (0.43-2.56) | aOR 1.00 (0.04-25.00) | OR 1.06 (0.24-4.67)  | aOR 0.86 (0.56-1.32) | aOR 1.09 (0.56-2.12)  | aOR 0.60 (0.03-12.00) |
| Goldshtein I <sup>15</sup>    | aOR 1.06 (0.92-1.22) | aOR 1.01 (0.90-1.13) | NA                           | NA                   | NA                    | aOR 0.16 (0.15-0.17) | NA                   | NA                    | NA                    |
| Dick A <sup>28</sup>          | OR 0.89 (0.71-1.12)  | OR 0.87 (0.70-1.08)  | OR 0.96 (0.65-1.42)          | NA                   | OR 0.87 (0.50-1.51)   | NA                   | OR 0.97 (0.84-1.12)  | OR 1.10 (0.81-1.49)   | NA                    |
| Fell DB <sup>18</sup>         | NA                   | NA                   | OR 0.90 (0.80-1.01)          | OR 0.83 (0.79-0.87)  | NA                    | OR 0.86 (0.79-0.94)  | OR 1.01 (0.97-1.05)  | OR 0.95 (0.87-1.04)   | OR 1.10 (0.88-1.38)   |

|                         |                     |                      |                      |                      |                     |                     |    |    |    |
|-------------------------|---------------------|----------------------|----------------------|----------------------|---------------------|---------------------|----|----|----|
| Magnus MC <sup>19</sup> | OR 0.90 (0.84-0.96) | aOR 0.97 (0.90-1.05) | aOR 0.97 (0.87-1.08) | aOR 0.97 (0.87-1.08) | OR 0.67 (0.50-0.90) | OR 0.60 (0.57-0.63) | NA | NA | NA |
|-------------------------|---------------------|----------------------|----------------------|----------------------|---------------------|---------------------|----|----|----|

aOR, adjusted odds ratio; COVID-19, coronavirus disease 2019; IFD, intrauterine fetal death; NA, not available; NICU, neonatal intensive care unit; OR, odds ratio; SGA, small for gestational age;

Value is shown as OR or aOR (95% confidence interval).

**eTable 3. The results of Egger's linear regression tests of the primary outcomes**

| Outcome                      | Intercept | <i>t</i> | <i>p</i> |
|------------------------------|-----------|----------|----------|
| NICU admission               | 0.99      | 1.11     | 0.303    |
| IFD                          | -0.39     | -0.75    | 0.479    |
| Preterm birth                | 0.40      | 0.28     | 0.787    |
| SGA                          | 0.82      | 1.79     | 0.116    |
| Low Apgar score (<7 at 5min) | 1.85      | 1.89     | 0.101    |

*IFD*, intrauterine fetal death; *NICU*, neonatal intensive care units; *SGA*, small-for-gestational-age

**eTable 4. Definitions of postpartum hemorrhage in each study**

| First author                  | Definition of postpartum hemorrhage                                                                      |
|-------------------------------|----------------------------------------------------------------------------------------------------------|
| Theiler RN <sup>25</sup>      | Hemorrhage that required blood transfusion.                                                              |
| Rottenstreich M <sup>26</sup> | More than 1,000 mL of estimated blood loss and/or more than 3 g/dL of hemoglobin drop from the baseline. |
| Blakeway H <sup>27</sup>      | More than 1,000 mL of estimated blood loss.                                                              |
| Dick A <sup>28</sup>          | More than 500 mL of estimated blood loss.                                                                |
| Fell DB <sup>18</sup>         | Not available                                                                                            |



**eFigure 1 Risk of bias summary**

|                      | Risk of bias due to confounding | Risk of bias arising from measurement of the exposure | Risk of bias in selection of participants into the study | Risk of bias due to post-exposure interventions | Risk of bias due to missing data | Risk of bias arising from measurement of the outcome | Risk of bias in selection of the reported result |
|----------------------|---------------------------------|-------------------------------------------------------|----------------------------------------------------------|-------------------------------------------------|----------------------------------|------------------------------------------------------|--------------------------------------------------|
| Blakeway H [27]      | -                               | +                                                     | +                                                        | ?                                               | +                                | +                                                    | +                                                |
| Dick A [28]          | +                               | +                                                     | +                                                        | ?                                               | +                                | +                                                    | +                                                |
| Fell DB [18]         | -                               | +                                                     | +                                                        | ?                                               | +                                | +                                                    | +                                                |
| Goldshstein I [15]   | +                               | +                                                     | +                                                        | ?                                               | +                                | +                                                    | +                                                |
| Lipkind HS [17]      | -                               | +                                                     | +                                                        | ?                                               | ?                                | +                                                    | +                                                |
| Magnus MC [19]       | -                               | +                                                     | +                                                        | ?                                               | +                                | +                                                    | +                                                |
| Mayo RP [24]         | -                               | +                                                     | -                                                        | ?                                               | +                                | ?                                                    | +                                                |
| Rottenstreich M [26] | -                               | +                                                     | +                                                        | ?                                               | +                                | +                                                    | +                                                |
| Theiler RN [25]      | -                               | +                                                     | +                                                        | ?                                               | +                                | +                                                    | +                                                |

**eFigure 2. Funnel plots of the primary outcomes (a. neonatal intensive care units admission, b. intrauterine fetal death, c. preterm birth, d. small-for-gestational-age, e. low Apgar score)**

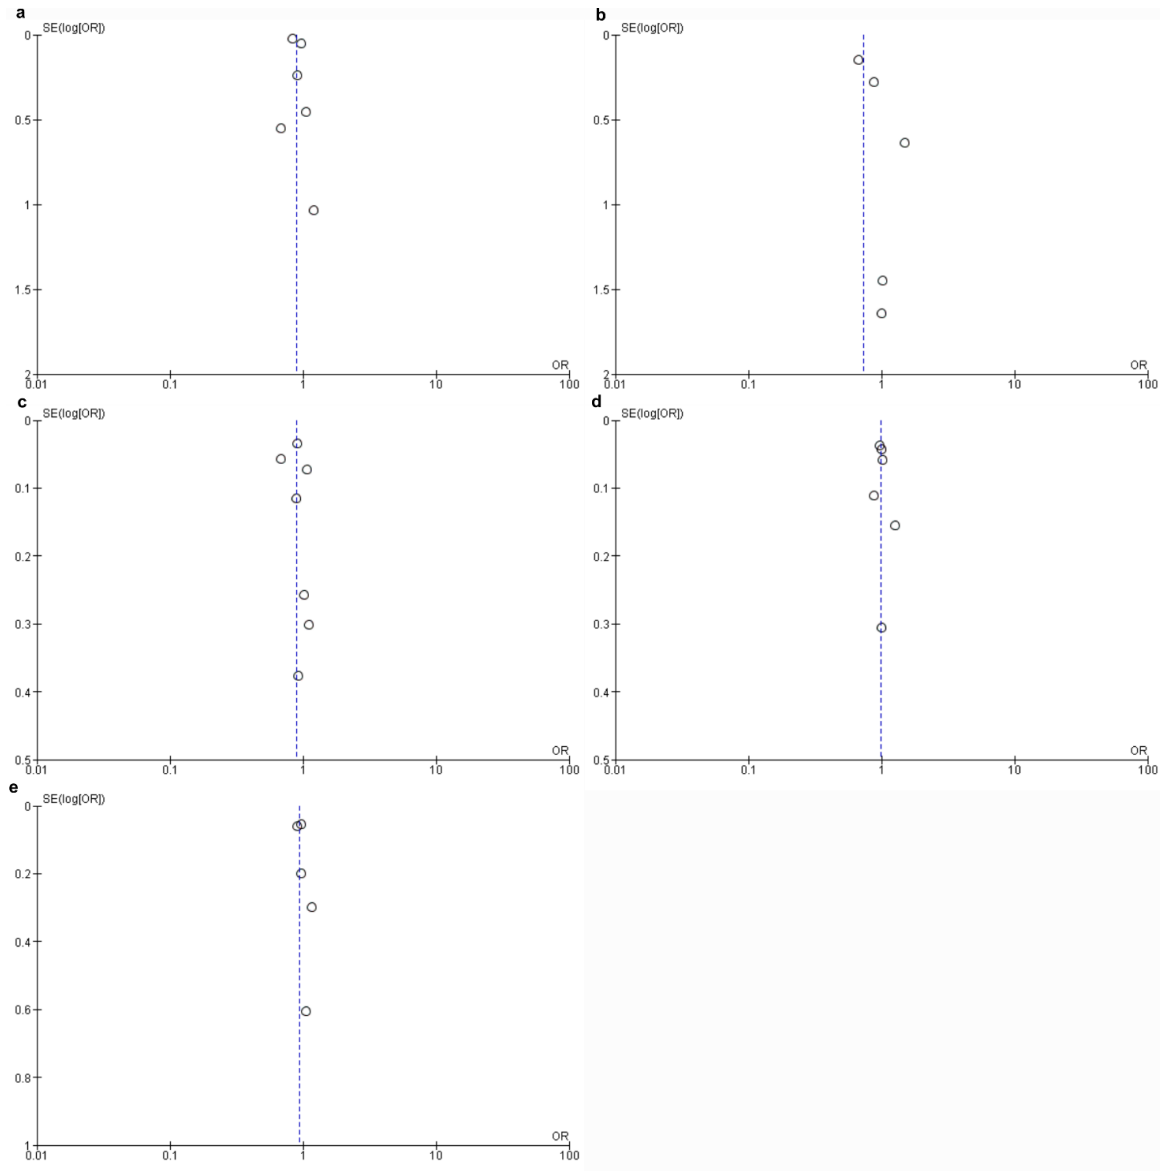

**eFigure 3. Forest plot showing the odds ratio of low Apgar score (<7 at 5 min of birth)**

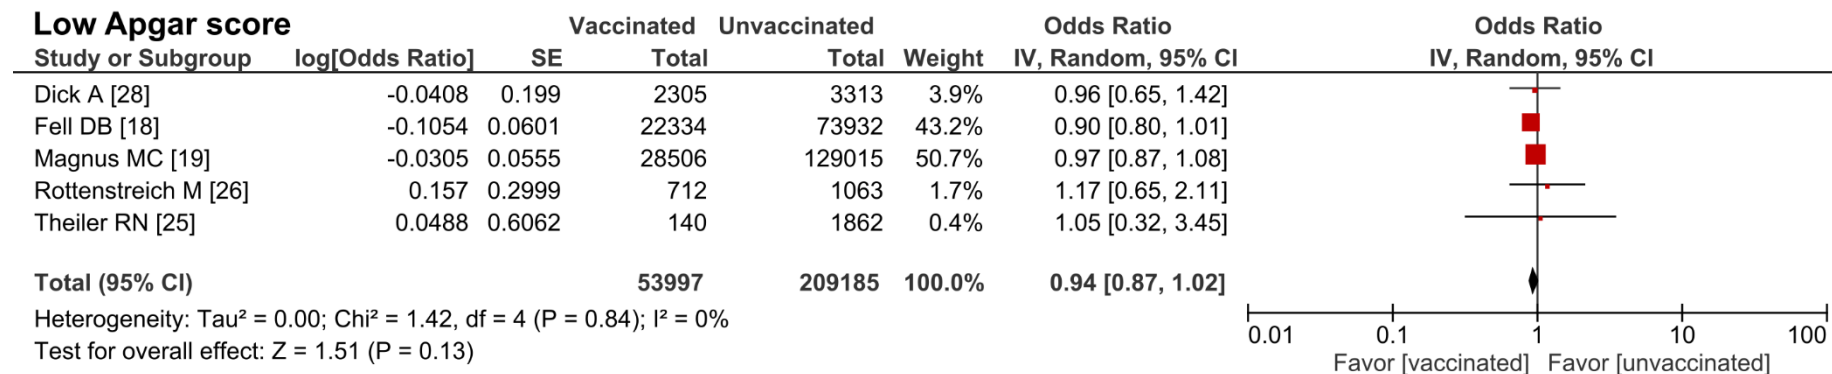

**eFigure 4. Forest plots showing the odds ratio of preterm birth (a: women who received COVID-19 vaccination during the first trimester vs. women who did not receive COVID-19 vaccination during pregnancy, b: women who received COVID-19 vaccination during the second or third trimester vs. women who did not receive COVID-19 vaccination during pregnancy)**

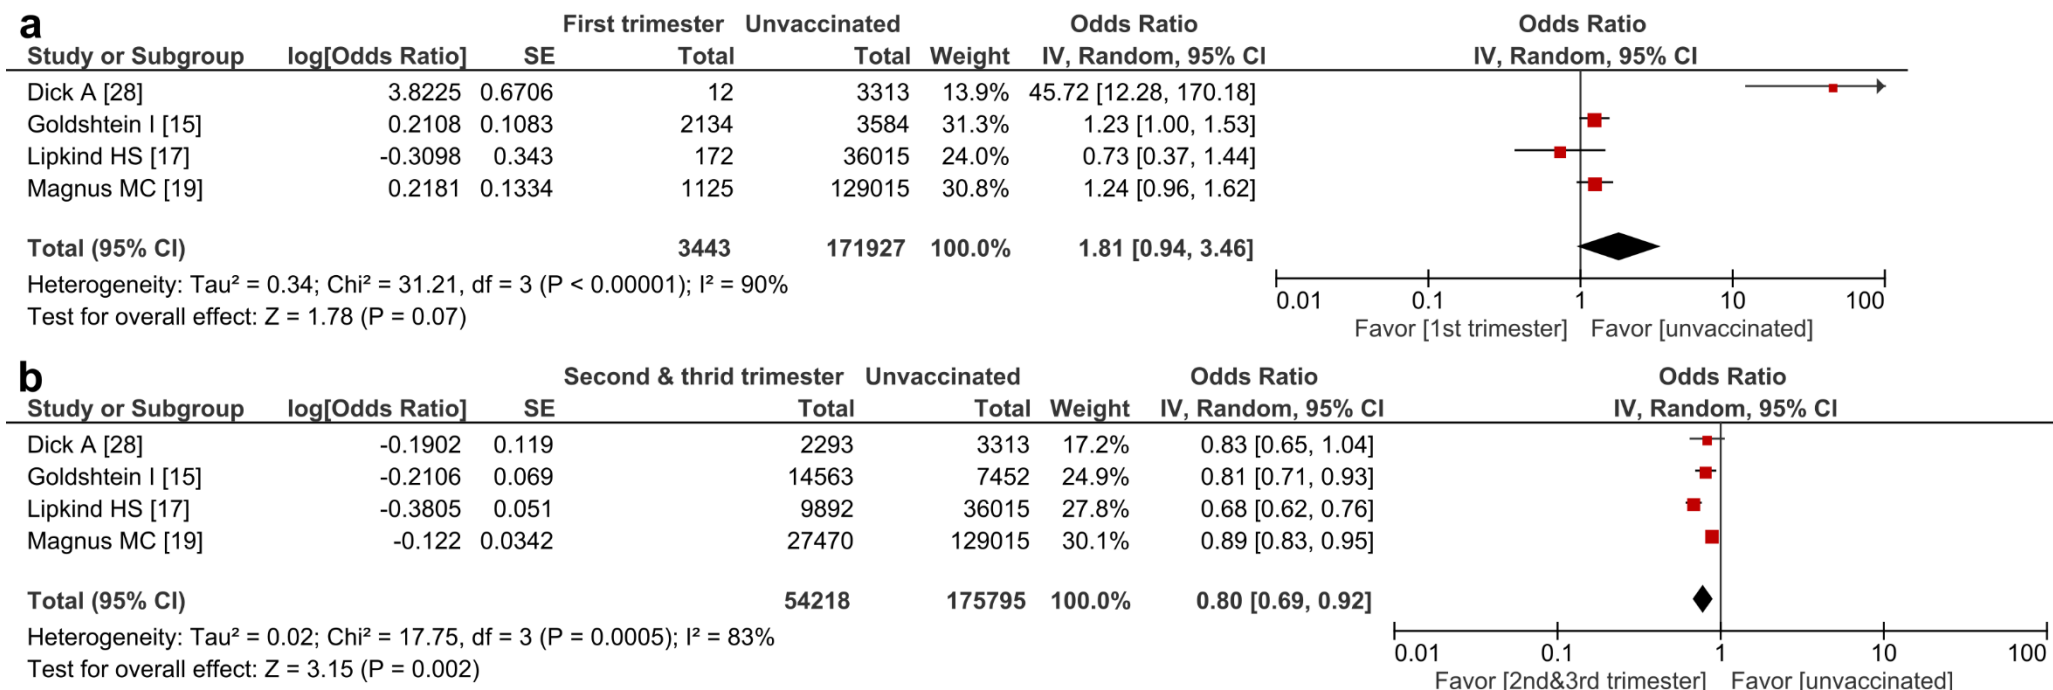

**eFigure 5. Forest plots showing the odds ratio of small size for gestational age (a: women who received COVID-19 vaccination during the first trimester vs. women who did not receive COVID-19 vaccination during pregnancy, b: women who received COVID-19 vaccination during the second or third trimester vs. women who did not receive COVID-19 vaccination during pregnancy)**

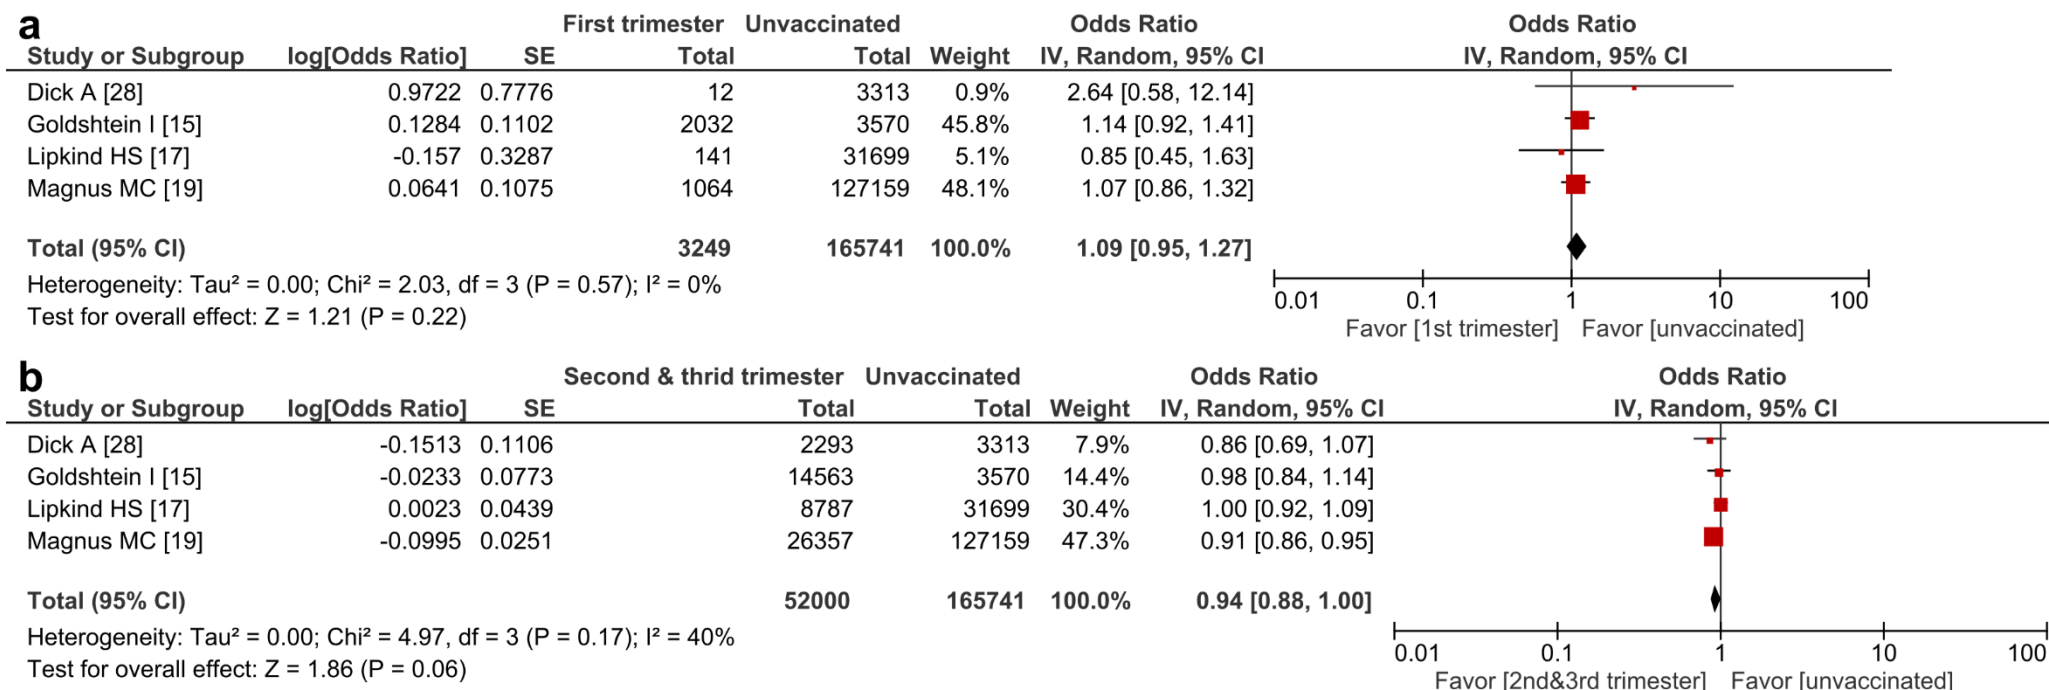

Supplement: jamapediatr-e223456-s001.pdf [file jamapediatr-e223456-s001.pdf]
